# Supplementary material for: Geothermal flux beneath the Antarctic Ice Sheet derived from measured temperature profiles in deep boreholes
Source: Copernicus journal article supplement (doi:10.5194/tc-2020-32), 2020-03-04
Supplement: Supplementary file [file tc-2020-32-AC1-supplement.pdf]

1     **Response to reviewers' comments on the manuscript "Geothermal flux beneath**  
2     **the Antarctic Ice Sheet derived from measured temperature profiles in deep**  
3     **boreholes" submitted to The Cryosphere**  
4

5     First of all, we would like to thank the Editor Alex Robinson and both anonymous  
6     reviewers for fruitful comments and advices. We tried to consider all mentioned issues  
7     and, in order to address comments (only critical ones), you will find here our answers  
8     point-by-point. The comments are in brown, and our answers are in black. Because our  
9     revised manuscript should not be prepared at this stage, we do not present text edits here.  
10    After addressing the issues raised, we believe that the manuscript can be accepted by  
11    Editor for further processing.

12  
13    **Anonymous Referee #1**

14    1. Heat flow model assumptions

15    The Antarctic ice sheet has an exceedingly long thermal memory and the slowest  
16    response time of the ice sheet is on a timescale exceeding 10 kyr (Ackert, 2003). The ice  
17    sheet is continuously in a transient state responding to past changes as well as  
18    contemporary forcings. The ice sheet is in disequilibrium, therefore, the assumption that  
19    the system is in a thermodynamical steady state must be properly justified and quantified.  
20    Otherwise, how are the results of this study meant to be interpreted against the literature  
21    (e.g. Martos et al., 2017; Passalacqua et al., 2017).

22    Over the last several glacial cycles, ice thickness, surface temperatures, and accumulation  
23    rates have varied across the ice core sites. Within the scope of a 1D time dependent heat  
24    flow model, these boundary conditions (BCs) directly impact the thermal profile of the  
25    ice. Many ice core records offer reconstructions of both temperature and accumulation  
26    rates through time. These could directly be applied as BCs into a time-dependent heat  
27    flow model rather than constant model parameters.

28    The structural uncertainty affiliated with the assumption of a steady state heat flow  
29    model should be quantified. Time-dependent transient experiments should be conducted  
30    with proper time-dependent BCs wherever appropriate to assess the impact of a steady  
31    state assumption on the GHF results. Supplemented with a proper uncertainty analysis,  
32    this would contextualize the results with the literature.

33    We agree with the reviewer that an exact steady state never occurs in reality and  
34    transient model likely would give more precise results instead of steady-state model. It  
35    is important to recognize that in both cases these will GHF "estimates", not  
36    "measurements". The thermal gradient can be affected by processes other than GHF,  
37    creating local anomalies that may coincide with the point estimate (e.g., Lake Whillans –  
38    Fisher et al., 2015). To use transient model, we need to know the accumulation rate and  
39    surface temperature in the past. For some of the discussed drill sites this data is available  
40    from ice-core studies, for some sites is not.

41    To evaluate possibility of using transient model, we did some more calculations for WAIS  
42    Divide site. The accumulation rate and surface temperature in the past were taken from  
43    the study of Buizert et al., 2015 (Fig. 1). In calculations, the history of ice sheet in WAIS  
44    Divide was assumed to be 68000 years long. The governing equation for transient model  
45    was solved by Finite Difference Method (FDM). The equation was discretized by both  
46    central difference method and upwind difference method and then solved in Matlab. To  
47    find best solution, the genetic algorithm (GA) algorithm was still used. The central

48 difference method and upwind difference method demonstrated the same temperature  
 49 profile. So, here we present the calculation results obtained via upwind difference  
 50 method.

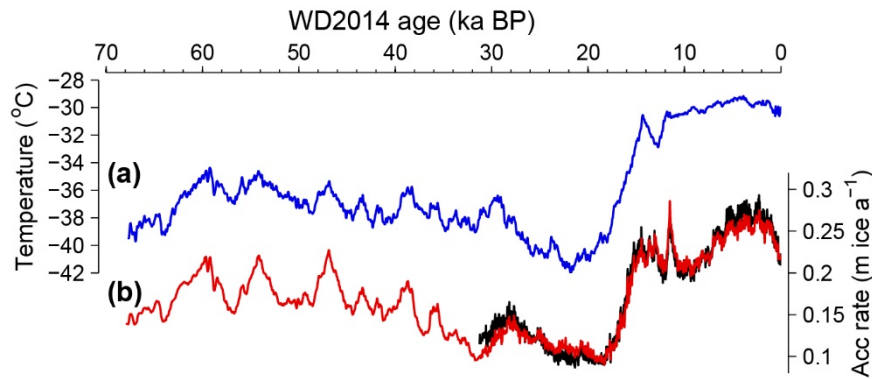

60 **Fig. 1.** WAIS Divide ice-core study implications: (a) past temperatures reconstructed from water  $\delta D$ ,  
 61 calibrated to the borehole temperature profile; (b) past accumulation rates as reconstructed by the firn  
 62 densification inverse model (red), and from the annual-layer count (black) (Buizert et al., 2015)

63  
 64 Unfortunately, the calculation results with transient model showed the best fit GHF value  
 65 of  $\sim 500 \text{ mW m}^{-2}$  when  $m = 1$ , which seems to be unrealistic. In addition, after running the  
 66 model, we found that after about 4-8 ka, the influence of initial temperature on  
 67 temperature profile can be ignored. Later, we assumed the vertical velocity factor  $m = 0$   
 68 and a GHF value of  $235 \text{ mW m}^{-2}$  showed good fit with measured temperature (which is  
 69 close to our estimations of  $251.3 \pm 24.1 \text{ mW m}^{-2}$  with steady state model and  $m = 1$ ). The  
 70 temperature distribution in history was modeled 61.2 ka, 54.4ka, ... 6.8 ka ago (Fig. 2). As  
 71 expected, the modelled temperature in the upper part of the ice sheet grossly changes  
 72 with time but in the lower portion ( $\sim 1000 \text{ m}$  above ice sheet base) these variations are  
 73 much smaller. This means the heat disturbance (atmosphere forcing: temperature and  
 74 precipitation) from the ice sheet surface are gradually decayed with the depth. From all  
 75 appearances, near-base portion is close to the steady state.

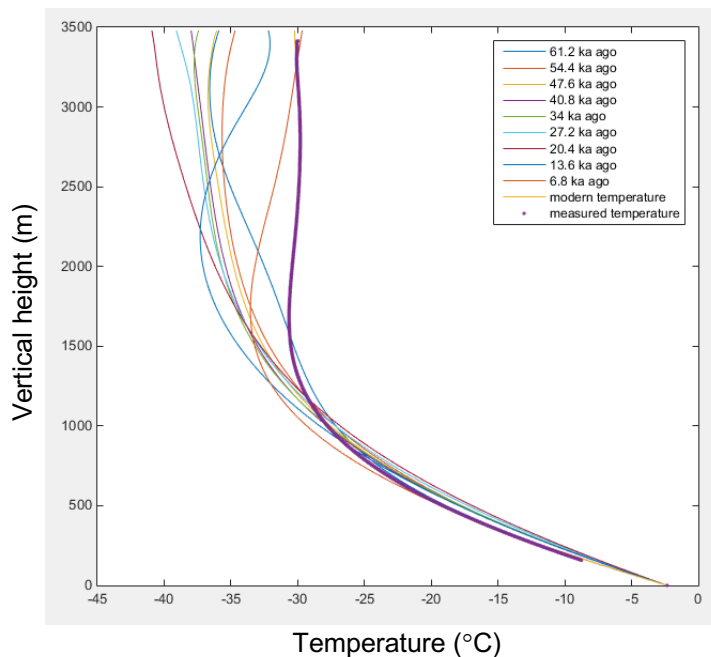

90 **Fig. 2.** Paleo temperature profiles based on transient model ( $m = 0$ )

92 Four drill sites (WAIS Divide, Dome C, Dome F, Vostok) are in close vicinity to ice divides  
 93 (Fig. 3a) where horizontal advection and horizontal heat conduction are assumed to be  
 94 minimal and the environment approximates a steady state (Cuffey and Paterson, 2010).  
 95 In areas with a relatively smooth bed, horizontal conduction is much lower than vertical  
 96 conduction (Hindmarsh, 1999, 2018) and horizontal advection and horizontal heat  
 97 conduction can also be safely neglected (Van Liefferinge et al., 2018). Therefore, the  
 98 interior slow-moving areas of the Antarctic Ice Sheet with smooth bed, including the rest  
 99 two sites – Byrd and Kohlen (Fig. 3b), also can be considered at thermal steady state in  
 100 their near-base portion.

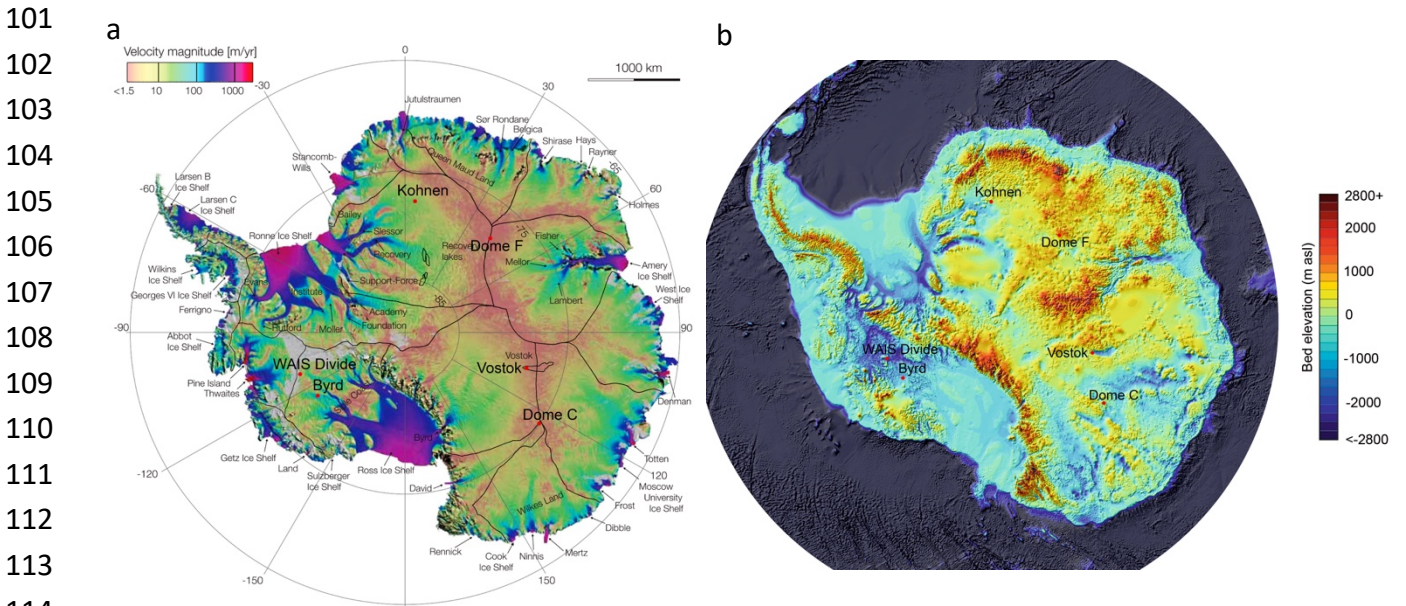

115 **Fig. 3.** (a) Antarctic surface ice velocity derived from satellite radar interferometry (Rignot et al., 2011);  
 116 (b) Antarctic bed topography (Fretwell et al., 2013) and locations of the deep ice-coring drill sites

118 Steady state model was intensively used in the past and is still used in the recent GHF  
 119 estimates in Antarctica (Martin and Gudmundsson, 2012; Mony et al., 2020; Parrenin et  
 120 al., 2017; Price et al., 2002; Zagorodnov et al., 2012 and others). Thus, we are of the  
 121 opinion that at first approximation, we can use a steady state model for GHF estimations.  
 122 In our method, the temperature in the lower portion of the ice sheets is assumed in steady  
 123 state and can be only well fitted by guessing the four key parameters (the surface  
 124 temperature, surface accumulation rate, basal melt, and basal temperature gradient).  
 125 Utilizing of the GA algorithm helps to find the better value of the four parameters. In GA,  
 126 the four parameters are not constrained in the range of the values they appeared in  
 127 history because any constraint of the parameters in historical range will show worse  
 128 fitting.

129 It is worth to be mentioned that the value of the parameters for best fitting got by GA is  
 130 not the real parameters in ice sheet history. They can be considered as “equivalent”  
 131 values for calculating modern temperature profile by eliminating the historical climate  
 132 change. Namely, the following steady state equation (Eq. 6 in text) is used to describe only  
 133 the temperature profile form instead of calculating the real value of these four  
 134 parameters. Consequently, the vertical velocity profile showed in the text is the  
 135 “equivalent” vertical velocity instead of real one.

136

137 
$$T = T_s - \left[ \frac{\partial T}{\partial z} \right]_B \int_0^z \exp \left( \frac{(w_{melt} - Acc)z^{m+2}}{\alpha_T(m+2)H^{m+1}} - \frac{w_{melt}}{\alpha_T} z \right) dz + \left[ \frac{\partial T}{\partial z} \right]_B \int_0^H \exp \left( \frac{(w_{melt} - Acc)z^{m+2}}{\alpha_T(m+2)H^{m+1}} - \frac{w_{melt}}{\alpha_T} z \right) dz. \quad (6)$$

138

139 The real melt rate is only calculated by the Eq. 7 in text. So, in total, the governing equation  
 140 for steady state model was used twice. At the first time, it was integrated to a temperature  
 141 distribution form (Eq. 6 in text) to fit lower portion of measured temperature in ice sheets,  
 142 and later, the equation was rearranged to calculate real melt rate by derivation of the Eq.  
 143 6.

144

145 
$$w(z) = \left[ \alpha_T \left( \frac{\partial^2 T}{\partial z^2} \right) - \alpha_T \left( \frac{1}{k} \frac{\partial k}{\partial T} \right) \left( \frac{\partial T}{\partial z} \right)^2 \right] / \frac{\partial T}{\partial z}. \quad (7)$$

146

147 So, the only uncertainties in our fitting model are coming from GA algorithm and from  
 148 variability of the form factor  $m$ . For each deep borehole, the fitting experiments were  
 149 trialed five times to avoid random error of GA. Then, the average value in the five fitting  
 150 experiments was used as the GHF from bedrock into ice at selected site and the  
 151 uncertainty ranges came from the difference between the maximum/minimum and the  
 152 average GHF values.

153 Choosing of the appropriate form factor  $m$  is really challenging task. In our manuscript  
 154 we stated (Lines 101-105):

155 “Classically, vertical velocity linearly depends on  $z/H$  (Cuffey and Paterson, 2010) and  $m$   
 156 = 0. However, at an ice divide, the downward flow of ice is slower, for the same depth,  
 157 than at locations away from the divide (Raymond, 1983). This reduces the cooling  
 158 influence of vertical advection and increases the basal temperature. Within this near-  
 159 divide zone, the form factor could be from 0.5 (Fischer et al., 2013) to 1.0 (Raymond,  
 160 1983). All discussed sites are located at, or near, ice divide, thus, we assume  $m = 1$ .”

161 To set up the vertical velocity profile at Dome C, Fischer et al. (2013) performed three  
 162 runs with  $m = 0.3$ ,  $m = 0.5$  and  $m = 0.7$  and found that the temperature profile is only  
 163 slightly affected by this choice. However, the form factor  $m$  had a strong influence on the  
 164 age profile of the ice. That was the reason why the authors used  $m = 0.5$ , which is in good  
 165 agreement with the EDC3 age scale.

166 To evaluate influence of  $m$  in the steady state model, we did some more calculations again  
 167 for WAIS Divide site. The results are summarized in the table below. The results from the  
 168 previous estimations that were trialed five times with  $m = 1$  are highlighted by grey.

169

| $m$                                  | 1               | 1               | 1               | 1               | 1               | Average value | Error | 0,75            | 0,5             | 0,25            | 0               |
|--------------------------------------|-----------------|-----------------|-----------------|-----------------|-----------------|---------------|-------|-----------------|-----------------|-----------------|-----------------|
| Interval, m                          | 2000-<br>bottom | 2000-<br>bottom | 2000-<br>bottom | 2000-<br>bottom | 2000-<br>bottom |               |       | 2000-<br>bottom | 2000-<br>bottom | 2000-<br>bottom | 2000-<br>bottom |
| Temperature gradient (°C/100m)       | 3,98            | 3,75            | 3,9             | 3,92            | 3,87            | 3,88          |       | 3,93            | 3,71            | 3,59            | 3,69            |
| Melt rate (cm/a)                     | 1,97            | 1,52            | 1,85            | 1,82            | 1,78            | 1,75          | 0,23  | 1,62            | 1,30            | 0,24            | -0,05           |
| Conductive flux (mW/m <sup>2</sup> ) | 83,7            | 79,1            | 82,1            | 82,6            | 81,5            | 81,4          | 2,3   | 82,78           | 81,55           | 75,86           | 77,75           |
| Melt flux (mW/m <sup>2</sup> )       | 191,7           | 148             | 179,5           | 176,3           | 172,9           | 169,9         | 21,9  | 157,56          | 125,87          | 24,22           | -4,88           |
| GHF (mW/m <sup>2</sup> )             | 275,4           | 227,2           | 261,7           | 259             | 254,5           | 251,3         | 24,1  | 240,3           | 207,4           | 100             | 72,8            |

170

171

172 Decreasing of  $m$  from 0.75 to 0 leads to reduction of GHF from 240.3 to 72.8 mW m<sup>-2</sup>. In  
 173 the latter case, the melt flux is negative meaning that the ice sheet base is frozen to the  
 174 bed (it is extremely unlikely). Because there are no clear considerations or prerequisites  
 175 for choosing of the form factor  $m$ , we still are on the opinion that at the first

176 approximation we can follow Raymond's (1983) arguments for deformation in the  
177 vicinity of ice divides and run with  $m = 1$ .

178 From the other hand, GHFs for WAIS Divide and Kohnen look really overestimated. The  
179 current WAIS team modeling shows that GHF at WAIS Divide is on the order of 105 mW  
180  $m^{-2}$  (unpublished as of yet) that corresponds to our GA result with steady state model and  
181 form factor  $m = 0.25$  ( $\sim 100$  mW  $m^{-2}$ ). Apparently, there are some other "physical"  
182 uncertainties that we did not know and did not account for these sites at the moment.  
183 Most likely that horizontal conduction in the bottom of the ice sheet at these sites is quite  
184 high and cannot be ignored. Thus, one of co-authors suggested to remove results of our  
185 GHF estimates for WAIS Divide and Kohnen from the revised version of the manuscript  
186 as some unsolved problems of the applied model and GA are still exist. However, we can  
187 try to go further with GHF estimates with GA for other four sites. Our further actions will  
188 depend on feedback from the editor, reviewers and final discussion within co-authors.

189

## 190 2. Surface forcing of heat flow model

191 The heat flow model uses four model parameters: surface temperature, surface  
192 accumulation rate, basal melt, and basal temperature gradient. This seems to suggest that  
193 the surface temperature and accumulation rate are constant values and not time  
194 dependent. What are the resultant optimal GA temperature and accumulation forcings  
195 for each ice core site and how do they compare to present day observed values? There is  
196 a passing mention of the accumulation rate being time dependent in Section 2.2 to  
197 calculate vertical velocities at each ice core site. What is this study using, constant surface  
198 accumulation rates (model parameter), time-dependent accumulation rates (vertical  
199 velocity inference), or both? How does the accumulation rate used in the vertical velocity  
200 calculations compare against the optimal rate inferred from the GA? The study should be  
201 consistently using time-dependent surface temperature and accumulation rates. No  
202 reference is provided for the accumulation time-series mentioned at line 99, rendering  
203 this work not reproducible by other researchers.

204 Section 2.2 of submitted manuscript contains general theoretical computation of  
205 temperature distribution in ice sheet at steady state. In our calculations, we do not use  
206 time-dependent values of the surface temperature and accumulation rate. These  
207 parameters are changed within GA in a wide range to fit the measured temperature. Then  
208 the "equivalent" accumulation rates and temperature can be calculated from GA results.  
209 The following table shows values of "equivalent" accumulation rates and temperature at  
210 ice sheet surface which were derived from our calculations. In all cases, "equivalent"  
211 accumulation rates are higher than modern ones while the "equivalent" surface  
212 temperature are close to modern ones. "Equivalent" vertical velocities at drilling sites  
213 derived from GA results are shown on Fig. 3 of submitted manuscript.

214

| Parameters                                       | Byrd | WAIS Divide | Vostok | Dome C | Kohnen | Dome F |
|--------------------------------------------------|------|-------------|--------|--------|--------|--------|
| "Equivalent" Acc ( $cm a^{-1}$ )                 | 64.7 | 97.4        | 8.95   | 3.70   | 7.22   | 3.00   |
| Modern Acc ( $cm a^{-1}$ )                       | 16.9 | 22.0        | 2.48   | 2.84   | 7.00   | 2.99   |
| "Equivalent" surface temperature ( $^{\circ}C$ ) | -29  | -30.8       | -56.5  | -54.6  | -45    | -56.5  |
| Modern surface temperature ( $^{\circ}C$ )       | -28  | -30         | -57    | -54.6  | -44    | -57.3  |

215

216 In general, the computational details that need to be captured and shared for  
217 reproducible research include: (1) the data that were used in the analysis; (2) written

218 statements in a programming language (i.e., the source code of the software used in the  
219 analysis or to generate data products); (3) numeric values of all configurable settings for  
220 software; (4) detailed specification of computational environment including system  
221 software and hardware requirements, including the version number of each software  
222 used; and (5) computational workflow (National Academies of Sciences, Engineering, and  
223 Medicine, 2019). All these are extremely extensive. We tried to provide baseline that can  
224 guarantee reproducibility of our scientific findings and will be happy to provide other  
225 data (if considered necessary).

226

### 227 3. Understated uncertainties

228 The GHF results come with uncertainty estimates that only represent one source of  
229 uncertainty affiliated with the initial parameter choices going into the GA. This significant  
230 underrepresents the overall uncertainties in their GHF estimates, which compromises  
231 the interpretation of their results with respect to the literature. The study does not  
232 account for structural uncertainties associated with their assumptions (steady state and  
233 no horizontal advection). Moreover, it is unclear if the ice thickness in the analysis is kept  
234 constant at present day values, this is not explicitly state. It appears the study uses  
235 constant ice thickness at each ice core site and does not attempt to estimate GHF  
236 uncertainties affiliated with this assumption. The heat flow model does not apply time-  
237 dependent surface temperature and accumulation rates, these time-series come with  
238 uncertainties which should also be propagated into the uncertainty model of the GHF  
239 estimations.

240 Furthermore, the uncertainty of the power law exponent (form factor) for the vertical  
241 velocity profile from Fischer et al. (2013) is not considered. The form factor could be  
242 anywhere from  $m = 0.5$  to 1, with the former being favoured by Fischer et al. (2013). The  
243 study chooses  $m=1$  without justifying that choice. The analysis should be conducted again  
244 using  $m=0.5$  and 0.75 to quantify the impact of the form factor on the GHF estimates. This  
245 would propagate parametric uncertainties of the vertical velocity parametrization to the  
246 GHF estimates.

247 The GA manages to identify parameter choices that produce a strong fit to the observed  
248 borehole temperatures. However, given the unquantified impact of model assumptions  
249 and model weaknesses, it is possible the model is overfitting the data. Therefore, the  
250 study would greatly benefit from more robust confidence intervals that incorporate  
251 parametric uncertainties and structural errors in the assumptions made in the heat flow  
252 model. Upon achieving this, the study would be able to assess the robustness of the  
253 anomalous GHF values at Kohnen and WAIS Divide.

254 In our calculations, the ice sheet thickness was kept at present day height. We agree with  
255 the reviewer that the ice sheet thickness at the studied sites varied in history. 3D thermo-  
256 mechanical model and the simple 1D model showed that the maximum variation of ice  
257 sheet thickness at Dome C and Dome F is less than 250 m in the history (Parrenin et al.,  
258 2007). Generally, the typical difference in the ice thickness in the glacial and interglacial  
259 periods at Dome C was 150 m (Passalacqua et al., 2017). At the Kohnen site, the local  
260 elevation variation is in the order of 100 m (Huybrechts et al., 2007). Located in east  
261 Antarctica plateau, the ice thickness variation at Vostok has the similar range as at Dome  
262 F and Dome C (Ritz et al., 2001).

263 The best evidences for ice-sheet elevation change in the interior of the West Antarctic ice  
264 sheet come from the Ohio Range, to the south of the WAIS Divide site at a height of 1600  
265 m a.s.l., and from Mt. Waesche to the north of the WAIS Divide site at a height of 2000 m

266 a.s.l. (Ackert et al., 1999, 2007). Moraines at Mt. Waesche were ~50 m higher and  
267 trimlines in the Ohio Range were ~125 m higher, between 12 and 10 ka. The ~100 m of  
268 thinning throughout the Holocene occurred as the grounding line retreated by hundreds  
269 of km and the accumulation rates were relatively stable (Anderson et al., 2002; Conway  
270 et al., 1999). The model of Cuffey et al. (2016) suggested that a more likely scenario of  
271 200 m thickening at WAIS Divide when accumulation rises after the last glacial maximum,  
272 followed by 300 m of thinning to the mid-Holocene. The elevation change is comparable  
273 to the amount of elevation change inferred for interior East Antarctic sites.

274 Comparing with the modern ice thickness value, the variation of ice thickness is small and  
275 its influence on ice temperature distribution can be neglected, especially on lower  
276 portion of the ice borehole. For example, assuming a 150 m thickness increase from the  
277 LGM to 15 ka changes the reconstructed LGM temperature by less than 0.2 °C compared  
278 to a constant thickness in WAIS ice core (Buizert et al., 2015). This is the reason why  
279 constant ice thickness is also used by other researchers for GHF estimations (Dahl-Jensen  
280 et al., 2003; Engelhardt, 2004; Mony et al., 2020).

281 To our knowledge, we used GA for the first time to find optimal solution of temperature  
282 fitting in ice sheets. GA can solve optimization problems by limiting unknown parameters  
283 changing in a predetermined range with any types of constraints, including integer  
284 constraints. This is very helpful in our study. In general, GA generates high-quality  
285 solutions for optimization problems and search problems.

286 Answers on the other comments were given hereinbefore.

287

288 **Minor comments:**

289 In Figure 1, a GHF comparison is shown at each ice core site. A legend showing which  
290 reference is affiliated with which color would clean up the figure and caption. This would  
291 remove all the subscript a-e appended onto each GHF bar graph.

292 We will be happy to add corrected figure in the revised version of the manuscript (see  
293 Fig. 4 in the current response).

294

295 **Anonymous Referee #2**

296 ... there are crucial aspects that are unclear from the text such as, why the results are  
297 important, what is the new gained knowledge, how these results compared with other  
298 local GHF values obtained through modeling in the same drill sites by other authors?

299 The Antarctic GHF is an important boundary condition for ice sheet behavior and  
300 associated sea level change (Golledge et al., 2015) since it keeps basal ice relatively warm,  
301 and thus less viscous than colder ice above, and helps supply meltwater at the ice sheet  
302 base. Typical questions are: What are the basal ice temperature and mechanical  
303 properties? How does GHF control basal melt and internal deformation of the ice sheet?  
304 How old is ice at different locations? These questions can be answered only by applying  
305 reliable GHF measurements or estimates. However, GHF remains poorly constrained,  
306 with few borehole-derived estimates, and there are large discrepancies in currently  
307 available glaciological and geophysical estimates (Burton-Johnson et al., 2020).

308 We estimated GHF at six sites – Byrd, WAIS Divide, Dome C, Kohnen, Dome F, and Vostok,  
309 which have succeeded in reaching to, or nearly to, the bed in inland locations in Antarctica.  
310 Our GHF estimates allow to validate continental and local models and reveal (if so) local  
311 geothermal anomalies.

312 Obtained GHF values are compared with five modellings (Shapiro and Ritzwoller, 2004;  
313 Fox Maule et al., 2005 Van Liefferinge and Pattyn, 2013; An et al., 2015; Martos et al., 2017)  
314 using bar graphs on the Fig. 1 (or Fig. 4 in the current response). Further comparison  
315 with this data and data from other references for specific sites was given in the “Results  
316 and discussion” section.

317

318 The manuscript lacks of a proper discussion section. The manuscript should separate  
319 results from discussion and conclusions. Additionally, a more detailed discussion is  
320 necessary.

321 In case if the manuscript will be accepted by Editor for further processing, we separate  
322 “Results and discussion” section into two sections “Results” and “Discussion”. We plan to  
323 add into “Discussion” the following details: (1) transient model vs. steady state model; (2)  
324 uncertainties; (3) comparison studies; (4) implications. In addition, “Conclusions” section  
325 will be presented.

326

327 In addition, key components of the methods are not adequately described or are missing.  
328 In particular, uncertainties are not adequately addressed which makes it difficult to  
329 evaluate the results and conclusions of this study.

330 We applied GA algorithm to fit measured temperature in deep ice-core drilling boreholes  
331 by variation guessing of the four key parameters influenced on temperature distribution:  
332 the surface temperature, surface accumulation rate, basal melt, and basal temperature  
333 gradient. All these parameters are suggested by algorithm in order to get the best-fitting  
334 curve. The only uncertainties in our fitting model are coming from GA algorithm itself and  
335 from variability of the form factor  $m$ . Detailed answers for applied method and  
336 uncertainties are given to Anonymous Referee #1 hereinbefore.

337

338 Below are my comments, suggestions and concerns that I hope will be useful for the  
339 authors to improve the manuscript:

340 - I suggest to change the title as it is not accurately representing the content of the  
341 manuscript.

342 The title can be changed to: “Geothermal heat flux from temperature profiles in deep ice-  
343 core drilling boreholes in Antarctica”.

344

345 - Regarding the discrepancy between the high values obtained in Kohnen and WAIS  
346 Divide in comparison with Antarctic-wide maps:

347 One thing to consider is that the Antarctic-wide geothermal heat flow maps are  
348 representing the heat flow of a region, while a heat flow value derived using borehole  
349 measurements is representing a specific local value. Therefore, probably these higher  
350 than predicted heat flow values obtained for Kohnen and WAIS Divide are only  
351 representing local values, not necessarily hot spots. The higher values could be  
352 consequence of, for example, a higher concentration of a particular radiogenic material  
353 in that spot, or a consequence of some particularity of the subglacial topography or the  
354 parameters and assumptions that are involved in the solutions of the model to obtain the  
355 local value. For these reasons, understanding the uncertainty sources and quantifying  
356 them is extremely important and it is necessary.



357 We agree with the reviewer that there are a large number of possible reasons for elevated  
358 GHF at Kohnen and WAIS Divide (variability of crustal thickness, hydrothermal  
359 circulation, high concentration of radiogenic materials in the bedrock, etc.). However, at  
360 this stage we are not able to give lucid explanations of this phenomenon. Uncertainty  
361 sources and quantifying were discussed above.

362

363 - L69: The manuscript should demonstrate the temperature measurement precision in a  
364 robust and scientific way

365 We will add evaluation of temperature measurement precision in the revised version of  
366 the paper. Uncertainties of temperature measurements in mechanically drilled boreholes  
367 filled with drilling fluids were presented in details by one of co-authors in USGS report  
368 (Clow, 2008).

369

370 - L78-80: Where is this shown? Quantify the good agreement. This is important for the  
371 uncertainties of the estimated local geothermal heat flow

372 This is shown in Table 1 (the line “Ice thickness according with radar/seismic survey (m)”)  
373 and Table 2 (the line “Ice thickness according with depth of pressure melting point (m)”).

374

375 - Figure 1: The drill sites as well as other local values are plotted in this figure together  
376 with a geological map for the Antarctic continent. However, the geology is not mentioned  
377 in the text, there is no discussion about results and the subglacial geology. What is the  
378 purpose of the geological map if it is not used in the manuscript? I recommend to either  
379 include some discussion about it or select another background data to plot the drill sites  
380 and discuss the results in that context.

381 At the first stage of the paper writing, we planned to connect revealed GHF values with  
382 Antarctic subglacial geology but then, because of the insufficiency of data, we dropped  
383 this idea. We agree with reviewer that it would be more rational to select another  
384 background, for example, with location of the Antarctic ice divides (Fig. 4).

385 - Regarding uncertainties I have two main comments/concerns:

386 1. How uncertainties are calculated is not adequately explained and more information  
387 and details are needed to evaluate the GHF estimates.

388 2. A substantial discussion about which parameters are contributing to the uncertainty is  
389 necessary. In addition, there are assumptions made in the thermodynamic model and also  
390 parameters that are assumed to be constant. These assumptions also carry uncertainties  
391 and they need to be properly quantified and included in the final uncertainty budget. For  
392 example, one important aspect to quantify would be the contribution to the uncertainty  
393 budget of considering steady-state condition.

394 We will be happy to add uncertainty considerations into revised version of the paper.

395

## 396 **References**

397 Ackert RP, David JB, Harold WB, Parker EC, Mark DK, James LF, Eric J (1999). Measurements of  
398 past ice sheet elevations in interior West Antarctica. *Science* 286(5438), 276-280.

399 Ackert RP, Mukhopadhyay S, Parizek BR, and Borns HW (2007). Ice elevation near the West  
400 Antarctic Ice Sheet divide during the Last Glaciation, *Geophys. Res. Lett.*, 34 (21),  
401 L21506. Anderson JB, Shipp SS, Lowe AL, Wellner JS, Mosola AB (2002). The Antarctic Ice

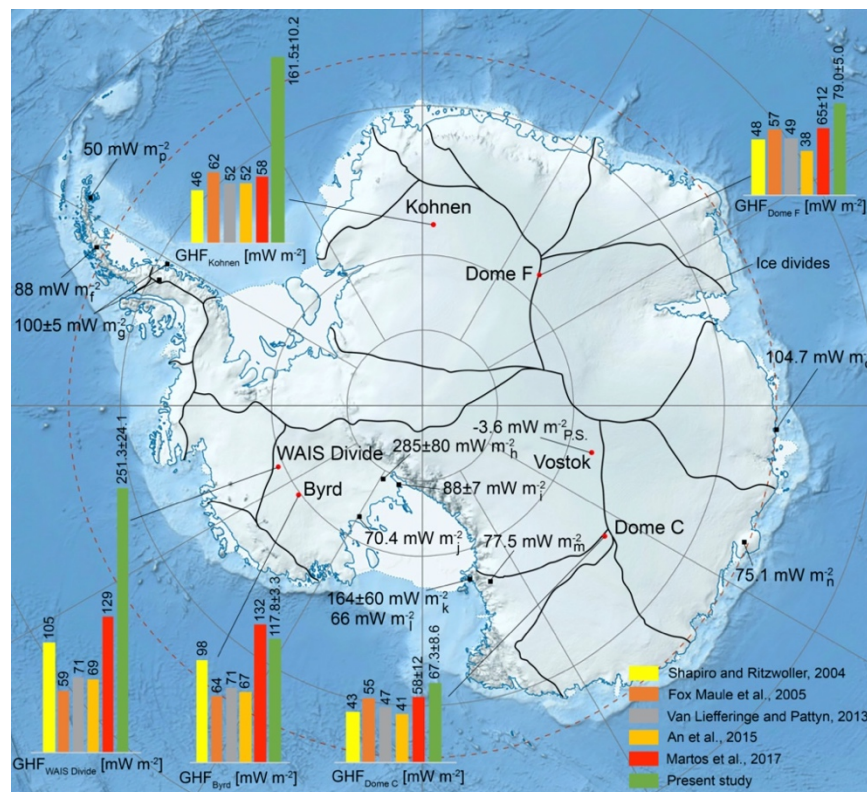

**Fig. 4.** GHF derived in the present study (P.S.) from basal temperature gradients in deep ice boreholes (green bars) compared with modelling. Location of the Antarctic ice divides is shown according with Rignot et al., 2011.

An M, Wiens DA, Zhao Y, Feng M, Nyblade A, Kanao M, Li Y, Maggi A, L v que J-J (2015) Temperature, lithosphere-asthenosphere boundary, and heat flux beneath the Antarctic Plate inferred from seismic velocities. *Journal of Geophysical Research: Solid Earth*, 120, 8720–8742.

Buizert C, Cuffey KM, Severinghaus JP, Baggenstos D, Fudge TJ, Steig EJ, Markle BR, Winstrup M, Rhodes RH, Brook EJ, Sowers TA, Clow GD, Cheng H, Edwards RL, Sigl M, McConnell JR, Taylor KC (2015). The WAIS Divide deep ice core WD2014 chronology – Part 1: Methane synchronization (68–31 ka BP) and the gas age–ice age difference *Clim. Past*, 11, 153–173.

Burton-Johnson A, Dziadek R, Martin, C. (2020). Geothermal heat flow in Antarctica: current and future directions, *The Cryosphere Discuss.*, in review.

Clow GD (2008) USGS Polar temperature logging system, description and measurement uncertainties: U.S. Geological Survey Techniques and Methods 2–E3.

Cuffey KM, Paterson WSB (2010). *The physics of glaciers*, 4th edn. Butterworth-Heinemann, Oxford.

Conway H, Hall BL, Denton GH, Gades AM, Waddington ED (1999). Past and future grounding-line retreat of the West Antarctic Ice Sheet. *Science*, 286, 280-283.

Cuffey KM, Clow GD, Steig EJ, Buizert C, Fudge TJ, Koutnik M, Waddington ED, Alley RB, Severinghaus JP (2016). Deglacial temperature history of West Antarctica. *PNAS*, 113 (50), 14249–14254.

446 Dahl-Jensen D, Gundestrup N, Gogineni SP, Miller H (2003). Basal melt at NorthGRIP modeled  
447 from borehole, ice-core and radio-echo sounder observations. *Ann. Glaciol.*, 37, 217-212.

448 Engelhardt H (2004) Ice temperature and high geothermal flux at Siple Dome, West Antarctica,  
449 from borehole measurements. *J Glaciol.*, 50(169), 251-256.

450 Fischer H, Severinghaus J, Brook E, Wolff E, Albert M, Alemany O, Arthern R, Bentley C,  
451 Blankenship D, Chappellaz J, Creyts T, Dahl-Jensen D, Dinn M, Frezzotti M, Fujita S, Galée  
452 H, Hindmarsh R, Hudspeth D, Jugie G, Kawamura K, Lipenkov V, Miller H, Mulvaney R,  
453 Parrenin F, Pattyn F, Ritz C, Schwander J, Steinhage D, van Ommen T, Wilhelms F (2013).  
454 Where to find 1.5 million yr old ice for the IPICS “Oldest-Ice” ice core. *Clim. Past*, 9, 2489–  
455 2505.

456 Fox Maule CF, Purucker ME, Olsen N, Mosegaard K. (2005) Heat flux anomalies in Antarctica  
457 revealed by satellite magnetic data. *Science*, 309, 464–467.

458 Fretwell P and 59 others (2013). Bedmap 2: improved ice bed, surface and thickness datasets for  
459 Antarctica. *The Cryosphere*, 7, 375–393.

460 Golledge NR, Kowalewski DE, Naish TR, Levy RH, Fogwill CJ, Gasson EGW (2015). The multi-  
461 millennial Antarctic commitment to future sea-level rise. *Nature*, 526(7573), 421–425.

462 Hindmarsh RCA (1999). On the numerical computation of temperature in an ice sheet. *J. Glaciol.*,  
463 45, 568–574.

464 Hindmarsh R (2018). Ice-sheet and glacier modelling, in: *Past Glacial Environments*, Elsevier,  
465 605–661.

466 Huybrechts P, Rybak O, Pattyn F, Ruth U, Steinhage D (2007). Ice thinning, upstream advection,  
467 and non-climatic biases for the upper 89% of the EDML ice core from a nested model of  
468 the Antarctic ice sheet. *Climate of the Past*, 3 (4), 577 - 589.

469 Martin C, Gudmundsson GH (2012). Effects of nonlinear rheology, temperature and anisotropy  
470 on the relationship between age and depth at ice divides. *The Cryosphere*, 6, 1221–1229.

471 Martos YM, Catalán M, Jordan TA, Golynsky A, Golynsky D, Eagles G, Vaughan DG (2017) Heat flux  
472 distribution of Antarctica unveiled. *Geophys Res Lett.*, 44, 11417–11426.

473 Mony L, Roberts JL, Halpin JA (2020). Inferring geothermal heat flux from an ice-borehole  
474 temperature profile at Law Dome, East Antarctica. *J. Glaciol.* 1–11.

475 National Academies of Sciences, Engineering, and Medicine (2019). *Reproducibility and  
476 replicability in science*. Washington, DC: The National Academies Press.

477 Parrenin F, Dreyfus G, Durand G, Fujita S, Gagliardini O, Gillet F, Jouze J, Kawamura K, Lhomme N,  
478 Masson-Delmotte V, Ritz C, Schwander J, Shoji H, Uemura R, Watanabe O, Yoshida N  
479 (2007). 1-D-ice flow modelling at EPICA Dome C and Dome Fuji, East Antarctica. *Climate  
480 of the Past*, 3 (2), 243 – 259. Parrenin F, Cavitte MGP, Blankenship DD, Chappellaz J, Fischer  
481 H, Gagliardini O, Masson-Delmotte V, Passalacqua O, Ritz C, Roberts J, Siegert MJ, Young  
482 DA (2017). Is there 1.5-million-year-old ice near Dome C, Antarctica? *The Cryosphere*, 11,  
483 2427–2437.

484 Passalacqua O, Ritz C, Parrenin F, Urbini S, Frezzott M (2017). Geothermal flux and basal melt rate  
485 in the Dome C region inferred from radar reflectivity and heat modelling. *Cryosphere*,  
486 11(5), 2231–2246. doi: 10.5194/tc-11-2231-2017.

487 Price PB, Nagornov OV, Bay R, Chirkin D, He Y, Miocinovic P, Richards A, Woschnagg K, Koci B,  
488 Zagorodnov V (2002). Temperature profile for glacial ice at the South Pole: Implications  
489 for life in a nearby subglacial lake. *PNAS* 99(12), 7844–7847.

490 Raymond CF (1983) Deformation in the vicinity of ice divides. *J. Glaciol.*, 29, 357–373.

491 Rignot E, Mouginot J, Scheuchl B (2011). Ice flow of the Antarctic Ice Sheet. *Science* 333, 1427-  
492 1430.

493 Ritz C, Rommelaere V, Dumas C (2001). Modeling the evolution of Antarctic ice sheet over the last  
494 420,000 years: Implications for altitude changes in the Vostok region. *Journal of*  
495 *Geophysical Research: Atmospheres*. 106 (D23), 31943 – 31964.

496 Shapiro NM, Ritzwoller MH (2004) Inferring surface heat flux distributions guided by a global  
497 seismic model: particular application to Antarctica. *Earth Planet. Sci. Lett.*, 223, 213-224.

498 Van Liefferinge B, Pattyn F (2013) Using ice-flow models to evaluate potential sites of million  
499 year-old ice in Antarctica. *Clim. Past*, 9, 2335–2345.

500 Van Liefferinge B, Pattyn F, Cavitte MGP, Karlsson NB, Young DA, Sutter J, Eisen O (2018)  
501 Promising Oldest Ice sites in East Antarctica based on thermodynamical modelling. *The*  
502 *Cryosphere*, 12, 2773–2787.

503 Zagorodnov V, Nagornov O, Scambos TA, Muto A, Mosley-Thompson E, Pettit EC, S. Tyufin S  
504 (2012). Borehole temperatures reveal details of 20th century warming at Bruce Plateau,  
505 Antarctic Peninsula. *The Cryosphere*, 6, 675–686.

506

507 On behalf of co-authors:

508 Pavel Talalay

509 Yazhou Li
